# Supplementary material for: Phytochemical Analysis, Antimicrobial Screening and In Vitro Pharmacological Activity of Artemisia vestita Leaf Extract
Source: MDPI journal article supplement (doi:10.3390/molecules29081829), 2024-04-17
Supplement: s1 [file molecules-2926220-supplementary.pdf › molecules-2926220-supplementary.pdf]

## Supplementary material

**Table S1.** Phytochemical compounds of *Artemisia vestita* leaf extract (ALE) from HP (India) detected by using GC-MS analysis and their biological activity.

| S No. | Retention time (min) | Name of the compound | Molecular formula                              | Molecular weight g/mol | Peak area (%) | Structure of compounds                                                               | Biological activity                                                                                        |
|-------|----------------------|----------------------|------------------------------------------------|------------------------|---------------|--------------------------------------------------------------------------------------|------------------------------------------------------------------------------------------------------------|
| 1.    | 4.62                 | Apigenin             | C <sub>15</sub> H <sub>10</sub> O <sub>5</sub> | 270.237                | 0.35          | 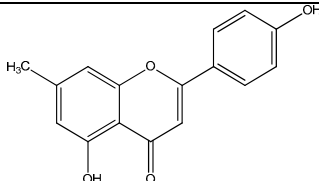   | Antioxidant, antimutagenic, anticarcinogenic, anti-inflammatory, and antiproliferative activities [1,5,11] |
| 2.    | 6.78                 | alpha-Pinene         | C <sub>10</sub> H <sub>16</sub>                | 136.2340               | 8.77          |  | Antimicrobial, apoptotic and antibiotic [9,15,21]                                                          |
| 3.    | 7.46                 | Camphene             | C <sub>10</sub> H <sub>16</sub>                | 136.2340               | 2.29          |  | Antioxidant, antimicrobial, apoptosis [30-32]                                                              |
| 4.    | 7.60                 | Yomogin              | C <sub>15</sub> H <sub>16</sub> O <sub>3</sub> | 244.29                 | 2.74          |  | Anti-inflammatory [24,28,29]                                                                               |
| 5.    | 8.11                 | Germacrene-D         | C <sub>15</sub> H <sub>24</sub>                | 204.3511               | 4.85          |  | Antimicrobial [24,33,35]                                                                                   |
| 6.    | 8.21                 | β-Myrcene            | C <sub>10</sub> H <sub>16</sub>                | 136.2340               | 1.6           |  | Analgesics, anti-diabetic, antioxidant, anti-inflammatory [24,28,29]                                       |

|    |       |                   |                                                |          |           |                                                                                       |                                                                                   |
|----|-------|-------------------|------------------------------------------------|----------|-----------|---------------------------------------------------------------------------------------|-----------------------------------------------------------------------------------|
| 7. | 8.88  | Limonene          | C <sub>10</sub> H <sub>16</sub>                | 136.23   | 0.26      | 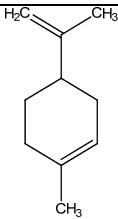   | Antitumor, antiviral, anti-inflammatory, and antibacterial [24,30-32]             |
| 8. | 9.33  | Isofraxidin       | C <sub>11</sub> H <sub>10</sub> O <sub>5</sub> | 222.1941 | 2.21      |     | Anti-bacterial, antioxidant, anti-depressive, and anti-inflammatory [16,24,28,29] |
| 9. | 9.50  | Camphor           | C <sub>10</sub> H <sub>16</sub> O              | 152.2334 | 1.2       |     | Antimicrobial, antifungal, bactericidal, and antiparasitic properties [16,30,31]  |
| 10 | 9.77  | 1,8-cineol        | C <sub>10</sub> H <sub>18</sub> O              | 154.2493 | 11.3<br>5 |   | Anti-inflammatory, antioxidant, antimicrobial [1,2,5,8,14]                        |
| 11 | 10.53 | Santolina triene  | C <sub>10</sub> H <sub>16</sub>                | 136.2340 | 0.7       |   | Antimicrobial, anti-inflammatory 1,5,30-32,33,35]                                 |
| 12 | 11.59 | Artemisia alcohol | C <sub>10</sub> H <sub>18</sub> O              | 154.25   | 5.62      |   | Antimicrobial [24,33,35]                                                          |
| 13 | 12.33 | Borneol           | C <sub>10</sub> H <sub>18</sub> O              | 154.2493 | 11.1<br>2 |  | Antioxidant, anti-inflammatory [22,25]                                            |
| 14 | 13.02 | Cirsilineol       | C <sub>17</sub> H <sub>14</sub> O <sub>7</sub> | 344.0896 | 2.25      |   | Antioxidant, anticancer, antibacterial, and immunosuppressive                     |

|    |       |                  |                                                |          |       |                                                                                      | activity [33,35,43]                                                                                                                            |
|----|-------|------------------|------------------------------------------------|----------|-------|--------------------------------------------------------------------------------------|------------------------------------------------------------------------------------------------------------------------------------------------|
| 15 | 13.23 | Thujone          | C <sub>10</sub> H <sub>16</sub> O              | 152.2334 | 0.12  | 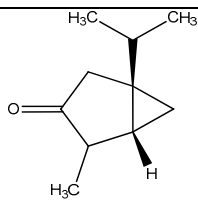  | Antioxidant, anti-inflammatory<br>[1,2,5,8,14]                                                                                                 |
| 16 | 13.69 | Quercetin        | C <sub>15</sub> H <sub>10</sub> O <sub>7</sub> | 302.2357 | 0.39  |    | Antioxidant<br>[11,22,25]                                                                                                                      |
| 17 | 13.84 | Grandisol        | C <sub>10</sub> H <sub>18</sub> O              | 154.25   | 28.45 |   | Antimicrobial<br>[1,2,5,8,14]                                                                                                                  |
| 18 | 14.65 | Naringenin       | C <sub>15</sub> H <sub>12</sub> O <sub>5</sub> | 272.257  | 0.53  |   | Antidiabetic, gastroprotective, anticancer, antiobesity, immunomodulator, cardioprotective, antimicrobial, nephroprotective<br>[1,2,5,8,11,19] |
| 19 | 15.53 | Artemisia ketone | C <sub>10</sub> H <sub>16</sub> O              | 152.233  | 3.12  |  | Antimicrobial<br>[24,33,35]                                                                                                                    |
| 20 | 16.74 | β-caryophyllene  | C <sub>15</sub> H <sub>24</sub>                | 204.36   | 5.67  |  | Antibacterial, antioxidant, gastroprotective, anxiolytic, anti-inflammatory<br>[1,2,5,8,14, 24,33,35]                                          |

|    |       |                  |                                   |          |      |  |                                                                         |
|----|-------|------------------|-----------------------------------|----------|------|--|-------------------------------------------------------------------------|
| 21 | 17.33 | Copaene          | C <sub>15</sub> H <sub>24</sub>   | 204.36   | 1.41 |  | Cytotoxicity, antiviral, antibacterial, anti-inflammatory [1,5,8,14,43] |
| 22 | 17.81 | $\alpha$ -amyrin | C <sub>30</sub> H <sub>50</sub> O | 426.7174 | 0.1  |  | Antinociceptive and anti-inflammatory [30-32]                           |

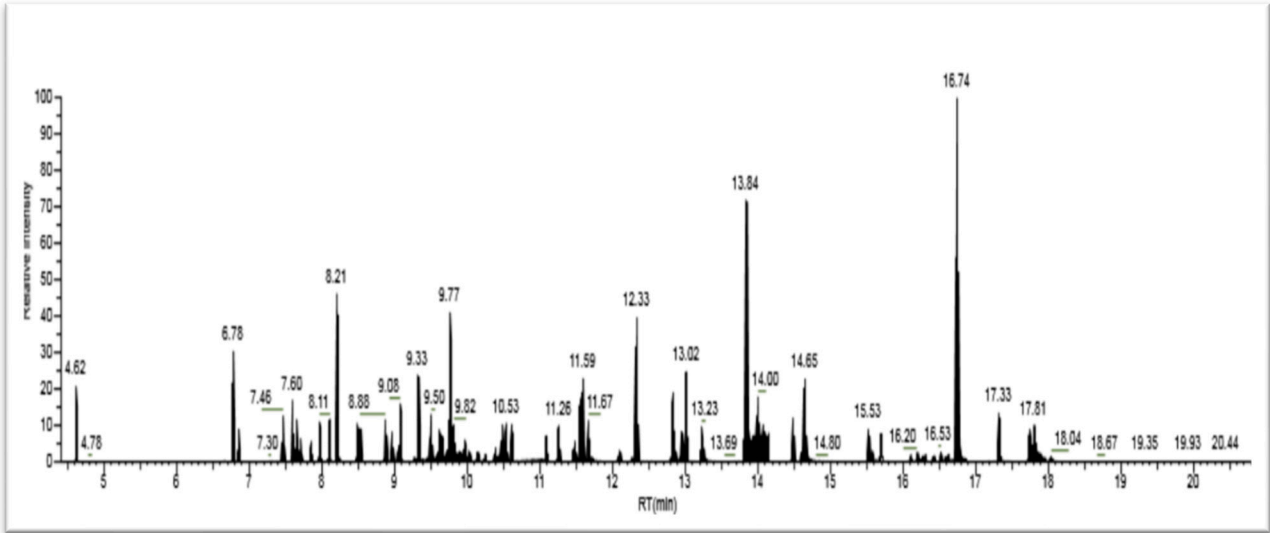

**Figure S1.** Gas chromatography mass spectrometry of *Artemisia vestita* leaf extract (ALE).
